# Supplementary material for: Abdominal visceral and subcutaneous adipose tissues in association with cardiometabolic risk in children and adolescents: the China Child and Adolescent Cardiovascular Health (CCACH) study
Source: PubMed Central journal article supplement — BMJ Open Diabetes Res Care. 2019 Dec 8;7(1):e000824. doi: 10.1136/bmjdrc-2019-000824 (PMC6904186; doi:10.1136/bmjdrc-2019-000824), 2019-12-08
Supplement: bmjdrc-2019-000824supp001.pdf [file bmjdrc-2019-000824supp001.pdf]

**China Child and Adolescent Cardiovascular Health collaboration group**

Jie Mi, MD, PhD, Yinkun Yan, MD, PhD, Hongbo Dong, MD, PhD, Department of Non-communicable Disease Management, Beijing Children's Hospital, Capital Medical University, National Center for Children's Health, Beijing, China;

Junting Liu, MS, Xiaoyuan Zhao, MS, Hong Cheng, MS, Dongqing Hou, MS, Fangfang Chen, MS, Guimin Huang, MS, Linghui Meng, PhD, Qin Liu, MS, Meixian Zhang, PhD, Wenpeng Wang, MS, Lijun Wu, PhD, Department of Epidemiology, Capital Institute of Pediatrics, Beijing, China;

Jinghui Sun, MD, Xiaona Wang, MD. Pediatric Cardiovascular Department, The First Hospital of Jilin University, Changchun, Jilin, China;

Ying Li, MD. Department of Pediatrics, People's Hospital of Tonghua, Tonghua, Jilin, China;

Weili Yan, PhD, Fang liu, PhD, Yi Zhang, MPH, Yi Cheng, MS, Shaoke Chen, MS, Qian Zhao, MS, Fang Cao, MS, Kai Mu, MS, Dayan Niu, MS. Department of Clinical Epidemiology, Children's Hospital of Fudan University, Shanghai, China;

Bo Xi, PhD, Min Zhao, PhD. Department of Epidemiology, School of Public Health, Shandong University, Jinan, Shandong, China;

Feng Xiong, MD, Gaohui Zhu, PhD. Department of Endocrinology, Children's Hospital of Chongqing Medical University, Chongqing, China;

Wenqing Ding, PhD, Ling Zhang, PhD, Leina Jia, MD. Department of Health Education and Child Health Care, School of Public Health, Ningxia University, Ningxia, China.

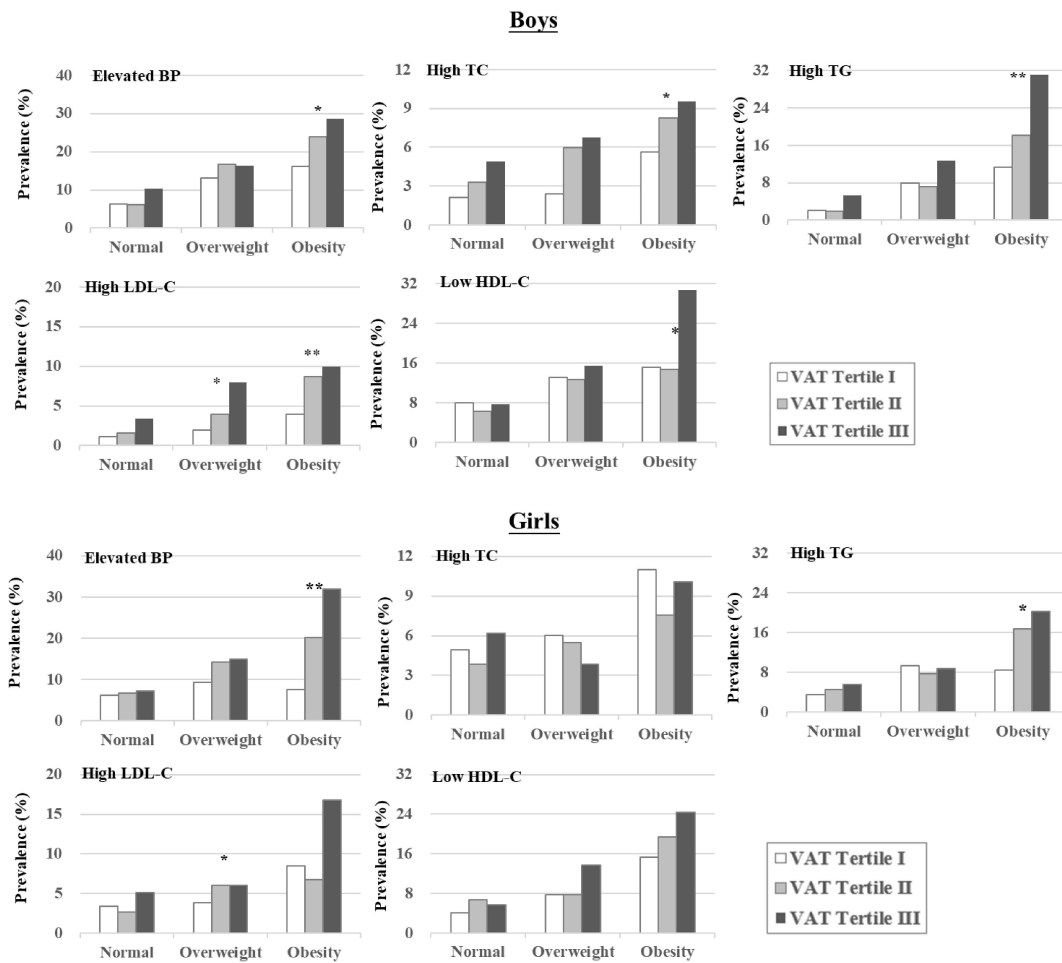

**Figure S1.** Prevalence of cardiometabolic risk factors across VAT tertiles among normal weight, overweight and obese individuals by sex

BP=blood pressure; TC=total cholesterol; TG=triglycerides; HDL-C=high-density lipid cholesterol; LDL-C=low-density lipid cholesterol; VAT=visceral adipose tissue.

p for trend: \*  $p < 0.05$ ; \*\*  $p < 0.01$ ; \*\*\*  $p < 0.001$

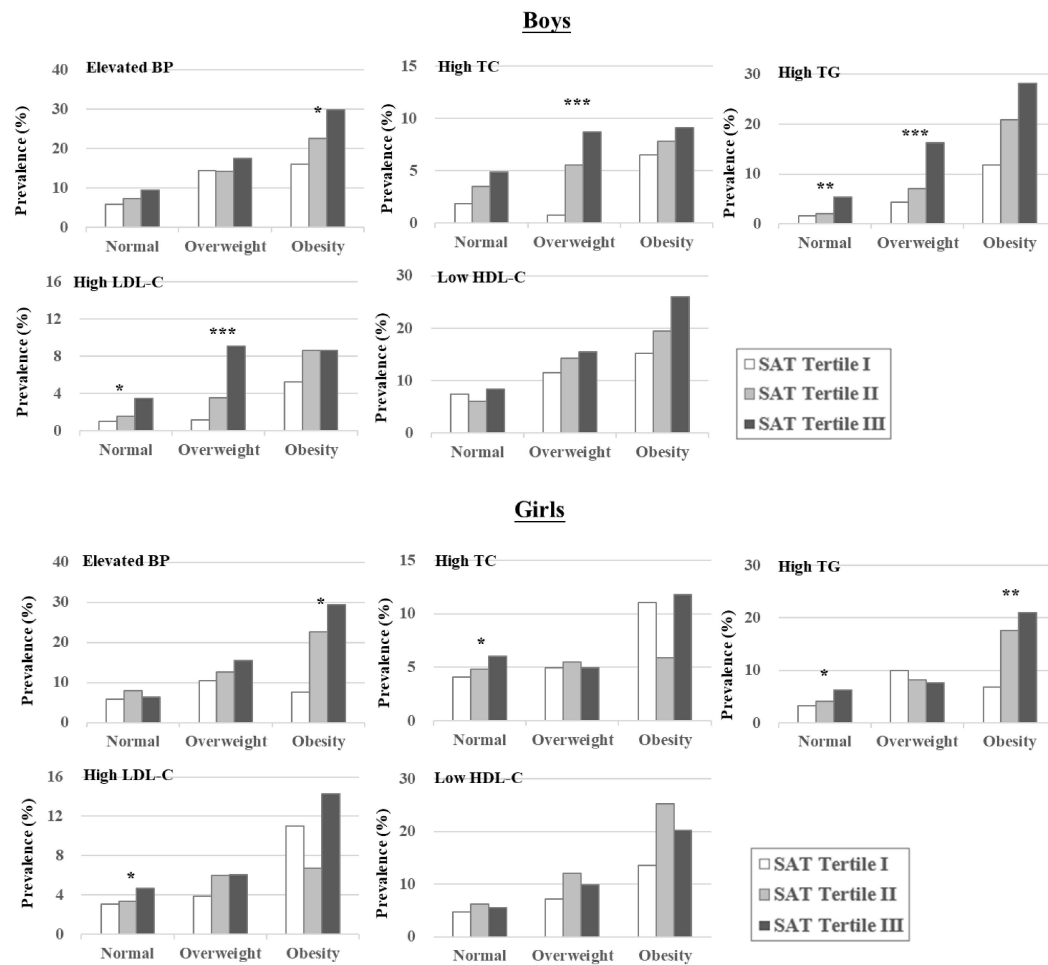

**Figure S2.** Prevalence of cardiometabolic risk factors across SAT tertiles among normal weight, overweight and obese individuals by sex

BP=blood pressure; TC=total cholesterol; TG=triglycerides; HDL-C=high-density lipid cholesterol; LDL-C=low-density lipid cholesterol; SAT= subcutaneous adipose tissue.

p for trend: \*  $p < 0.05$ ; \*\*  $p < 0.01$ ; \*\*\*  $p < 0.001$

**Table S1.** Linear Regression of Cardiometabolic Risk Factors Associated with 1-SD Increase in VAT and SAT by Sex

|              | Boys         |        |              |        |              |        | Gils         |        |              |        |              |        | p for sex interaction* |
|--------------|--------------|--------|--------------|--------|--------------|--------|--------------|--------|--------------|--------|--------------|--------|------------------------|
|              | Model 1      |        | Model 2      |        | Model 3      |        | Model 1      |        | Model 2      |        | Model 3      |        |                        |
|              | $\beta$ (se) | p      |                        |
| <b>SBP</b>   |              |        |              |        |              |        |              |        |              |        |              |        |                        |
| VAT          | 3.20 (0.16)  | <0.001 | 0.24 (0.28)  | 0.403  | 0.16 (0.22)  | 0.471  | 2.40 (0.15)  | <0.001 | 0.15 (0.25)  | 0.532  | 0.34 (0.21)  | 0.105  | 0.735                  |
| SAT          | 3.28 (0.16)  | <0.001 | 1.50 (0.37)  | <0.001 | 0.62 (0.26)  | 0.018  | 2.40 (0.15)  | <0.001 | 0.89 (0.29)  | 0.002  | 0.10 (0.24)  | 0.662  | 0.067                  |
| <b>DBP</b>   |              |        |              |        |              |        |              |        |              |        |              |        |                        |
| VAT          | 1.46 (0.12)  | <0.001 | 0.51 (0.22)  | 0.020  | 0.83 (0.18)  | <0.001 | 1.21 (0.12)  | <0.001 | 0.19 (0.20)  | 0.343  | 0.72 (0.17)  | <0.001 | 0.128                  |
| SAT          | 1.44 (0.12)  | <0.001 | 0.18 (0.29)  | 0.542  | 0.74 (0.21)  | <0.001 | 1.01 (0.12)  | <0.001 | 0.79 (0.24)  | 0.001  | 0.21 (0.20)  | 0.282  | <0.001                 |
| <b>TC</b>    |              |        |              |        |              |        |              |        |              |        |              |        |                        |
| VAT          | 6.84 (0.41)  | <0.001 | 5.93 (0.76)  | <0.001 | 8.09 (0.61)  | <0.001 | 3.50 (0.44)  | <0.001 | 5.13 (0.75)  | <0.001 | 5.92 (0.64)  | <0.001 | 0.289                  |
| SAT          | 7.01 (0.41)  | <0.001 | 8.16 (1.00)  | <0.001 | 10.42 (0.71) | <0.001 | 3.34 (0.44)  | <0.001 | 5.81 (0.88)  | <0.001 | 6.78 (0.72)  | <0.001 | 0.013                  |
| <b>TG</b>    |              |        |              |        |              |        |              |        |              |        |              |        |                        |
| VAT          | 14.11 (0.56) | <0.001 | 3.95 (1.03)  | <0.001 | 8.35 (0.83)  | <0.001 | 7.44 (0.53)  | <0.001 | 3.52 (0.91)  | <0.001 | 3.88 (0.77)  | <0.001 | 0.658                  |
| SAT          | 15.53 (0.56) | <0.001 | 7.69 (1.34)  | <0.001 | 11.74 (0.97) | <0.001 | 7.61 (0.53)  | <0.001 | 4.45 (1.06)  | <0.001 | 4.46 (0.87)  | <0.001 | 0.007                  |
| <b>LDL-C</b> |              |        |              |        |              |        |              |        |              |        |              |        |                        |
| VAT          | 7.65 (0.34)  | <0.001 | 5.18 (0.63)  | <0.001 | 6.92 (0.50)  | <0.001 | 4.80 (0.36)  | <0.001 | 4.80 (0.62)  | <0.001 | 5.44 (0.53)  | <0.001 | 0.543                  |
| SAT          | 7.97 (0.34)  | <0.001 | 7.26 (0.82)  | <0.001 | 8.76 (0.59)  | <0.001 | 4.64 (0.36)  | <0.001 | 4.91 (0.72)  | <0.001 | 5.79 (0.59)  | <0.001 | 0.002                  |
| <b>HDL-C</b> |              |        |              |        |              |        |              |        |              |        |              |        |                        |
| VAT          | -2.29 (0.16) | <0.001 | -0.52 (0.29) | 0.076  | -0.49 (0.23) | 0.033  | -1.90 (0.16) | <0.001 | -0.67 (0.28) | 0.017  | -0.41 (0.24) | 0.083  | 0.599                  |
| SAT          | -2.52 (0.16) | <0.001 | -1.16 (0.38) | 0.002  | -0.63 (0.27) | 0.020  | -1.88 (0.16) | <0.001 | -0.33 (0.33) | 0.316  | -0.03 (0.27) | 0.920  | 0.020                  |

SBP=systolic blood pressure; DBP=diastolic blood pressure; TC=total cholesterol; TG=triglycerides; HDL-C=high-density lipid cholesterol; LDL-C=low-density lipid cholesterol; VAT=visceral adipose tissue; SAT= subcutaneous adipose tissue

Model 1, adjusted for region, family income, age, puberty development, family history of chronic disease, physical activity, and smoking; Model 2, model 1+adjusted for fat mass index; Model 3, model 1+adjusted for body mass index

\* p for sex-interaction for model 2.

**Table S2.** Odds and 95% Confidence Interval of Cardiometabolic Risk Factors Associated with 1-SD Increase in VAT and SAT by Age

|             | 6-11 y           |                  |                  | 12-18 y          |                  |                  | p for sex interaction* |
|-------------|------------------|------------------|------------------|------------------|------------------|------------------|------------------------|
|             | Model 1          | Model 2          | Model 3          | Model 1          | Model 2          | Model 3          |                        |
| Elevated BP |                  |                  |                  |                  |                  |                  |                        |
| VAT         | 1.69 (1.51-1.90) | 1.25 (1.01-1.57) | 1.26 (1.06-1.50) | 1.52 (1.42-1.63) | 1.14 (1.00-1.31) | 1.22 (1.10-1.35) | 0.716                  |
| SAT         | 1.72 (1.54-1.92) | 1.40 (1.02-1.93) | 1.24 (1.02-1.52) | 1.57 (1.46-1.69) | 1.29 (1.01-1.45) | 1.18 (1.04-1.35) | 0.422                  |
| High TC     |                  |                  |                  |                  |                  |                  |                        |
| VAT         | 1.32 (1.14-1.54) | 1.13 (0.84-1.53) | 1.51 (1.17-1.94) | 1.45 (1.32-1.58) | 1.24 (1.02-1.51) | 1.51 (1.33-1.73) | 0.068                  |
| SAT         | 1.36 (1.18-1.57) | 1.32 (0.87-1.99) | 1.89 (1.43-2.50) | 1.49 (1.34-1.65) | 1.09 (0.80-1.50) | 1.67 (1.40-2.00) | 0.104                  |
| High TG     |                  |                  |                  |                  |                  |                  |                        |
| VAT         | 2.25 (1.97-2.57) | 1.39 (1.08-1.81) | 1.47 (1.19-1.83) | 1.63 (1.51-1.76) | 1.23 (1.07-1.42) | 1.35 (1.21-1.50) | 0.083                  |
| SAT         | 2.26 (1.98-2.57) | 1.44 (1.02-2.03) | 1.53 (1.21-1.94) | 1.79 (1.64-1.95) | 1.31 (1.01-1.69) | 1.54 (1.33-1.78) | 0.054                  |
| High LDL-C  |                  |                  |                  |                  |                  |                  |                        |
| VAT         | 1.72 (1.46-2.03) | 1.43 (1.02-2.01) | 1.76 (1.33-2.33) | 1.56 (1.43-1.71) | 1.33 (1.10-1.61) | 1.52 (1.33-1.73) | 0.815                  |
| SAT         | 1.71 (1.46-2.00) | 1.55 (1.01-2.41) | 1.97 (1.44-2.70) | 1.59 (1.43-1.77) | 1.08 (0.81-1.43) | 1.52 (1.27-1.82) | 0.956                  |
| Low HDL-C   |                  |                  |                  |                  |                  |                  |                        |
| VAT         | 1.76 (1.55-2.00) | 1.63 (1.23-2.16) | 1.28 (1.04-1.58) | 1.44 (1.34-1.54) | 1.17 (1.02-1.35) | 1.17 (1.06-1.29) | 0.009                  |
| SAT         | 1.77 (1.57-2.00) | 2.35 (1.64-3.37) | 1.34 (1.07-1.68) | 1.49 (1.38-1.60) | 1.30 (1.05-1.61) | 1.15 (1.01-1.31) | 0.003                  |

OR=odds ratio; CI=confidence interval; TC=total cholesterol; TG=triglycerides; HDL-C=high-density lipid cholesterol; LDL-C=low-density lipid cholesterol;

VAT=visceral adipose tissue; SAT= subcutaneous adipose tissue

Model 1, adjusted for region, family income, sex, puberty development, family history of chronic disease, physical activity, and smoking; Model 2, model 1+ adjusted for fat mass index; Model 3, model 1+adjusted for body mass index

\*, p for sex-interaction for model 2.
